# Supplementary material
Source: HighWire-hosted journal article supplement (https://diabetes.diabetesjournals.org/content/suppl/2007/01/18/db06-0883)

**Figure 1**

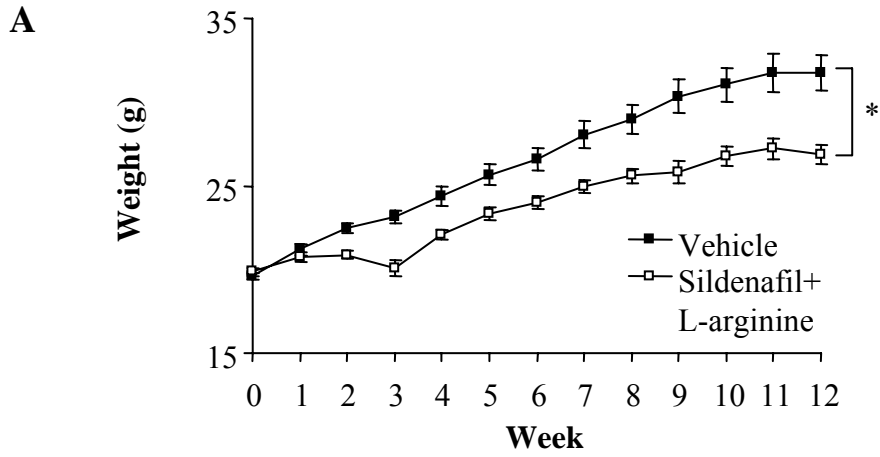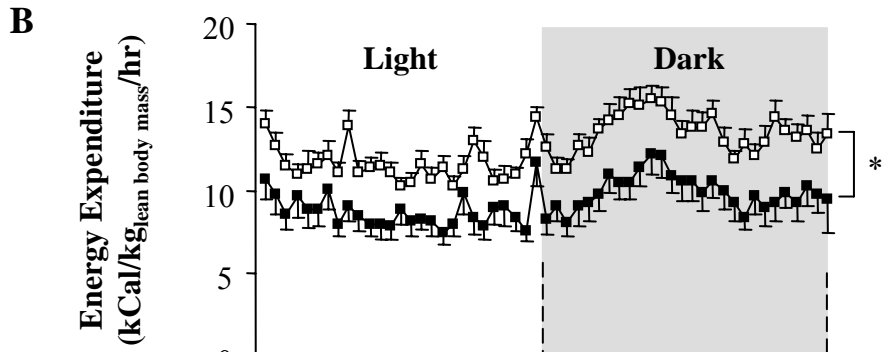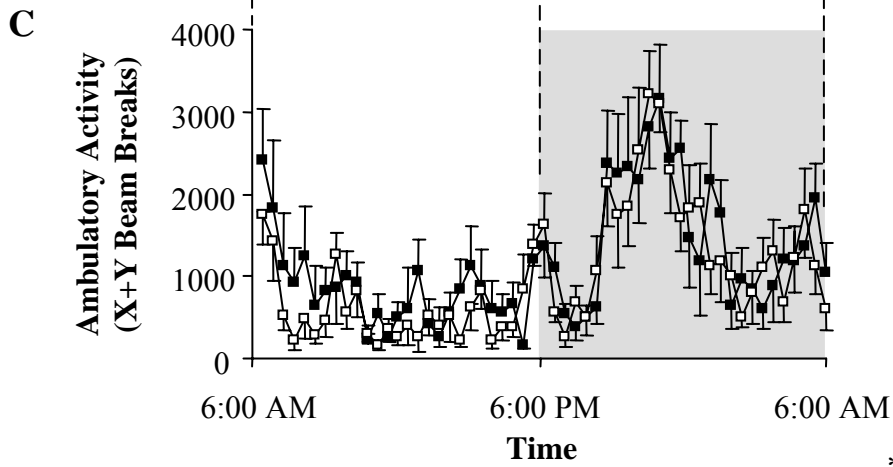

\*  $P < 0.05$  vs. Vehicle

**Figure 2**

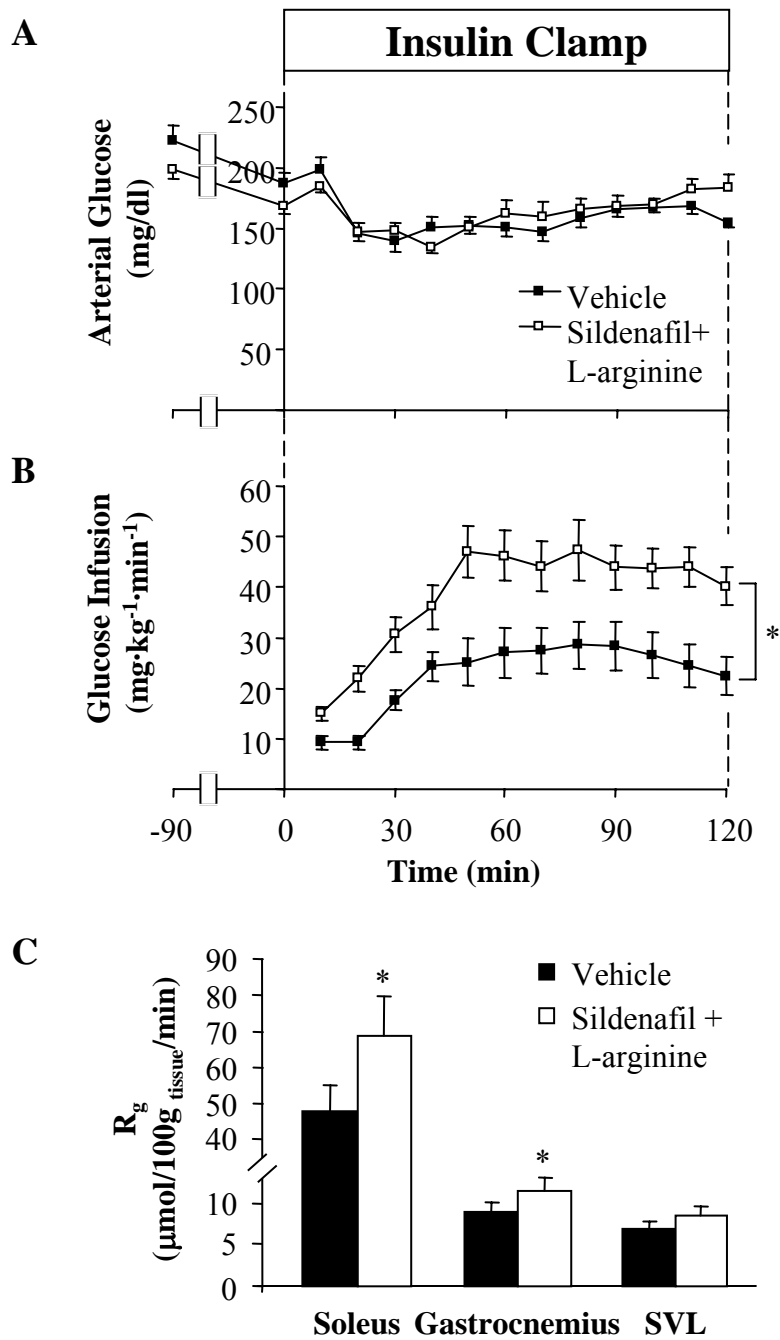

\*  $P \leq 0.05$  vs. Vehicle

**Figure 3**

**A**

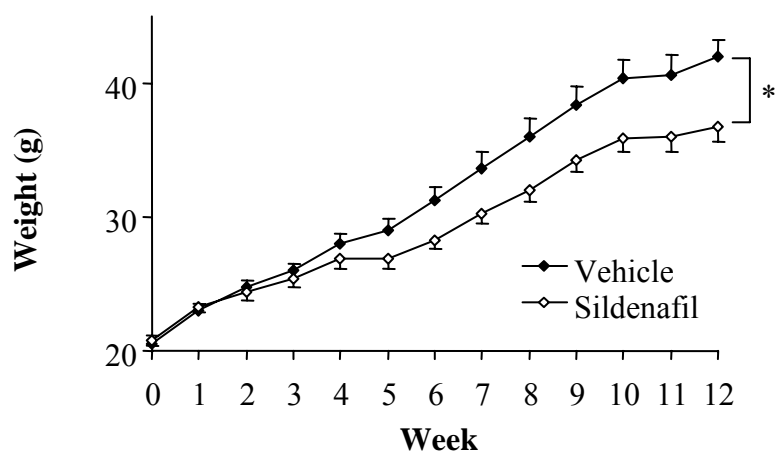

**B**

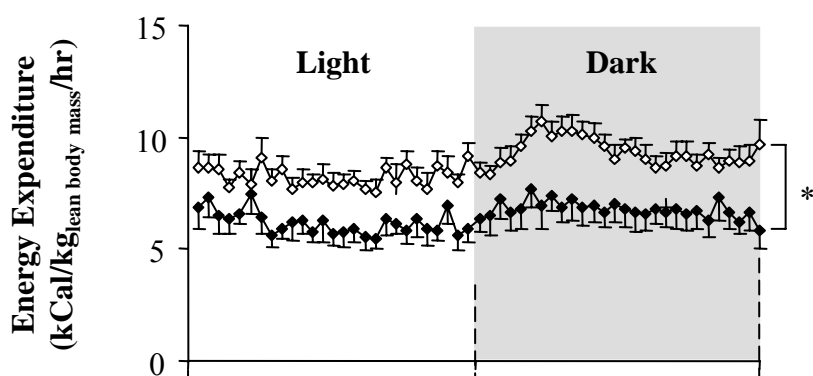

**C**

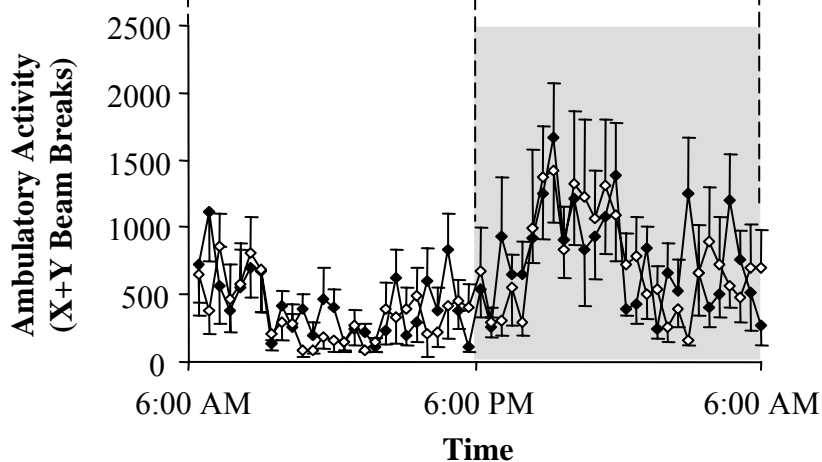

**D**

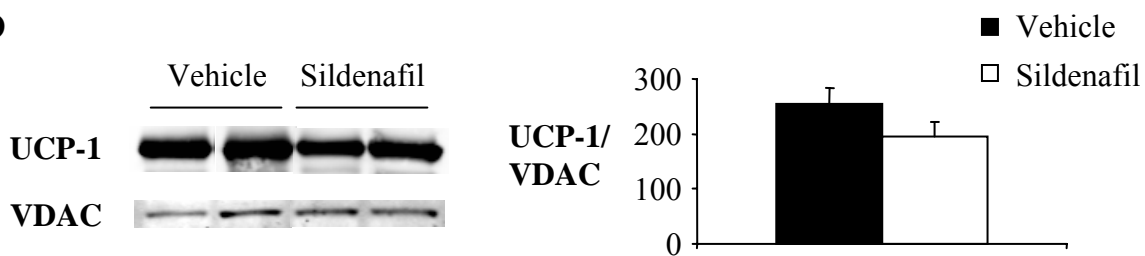

\*  $P < 0.05$  vs. Vehicle

Figure 4

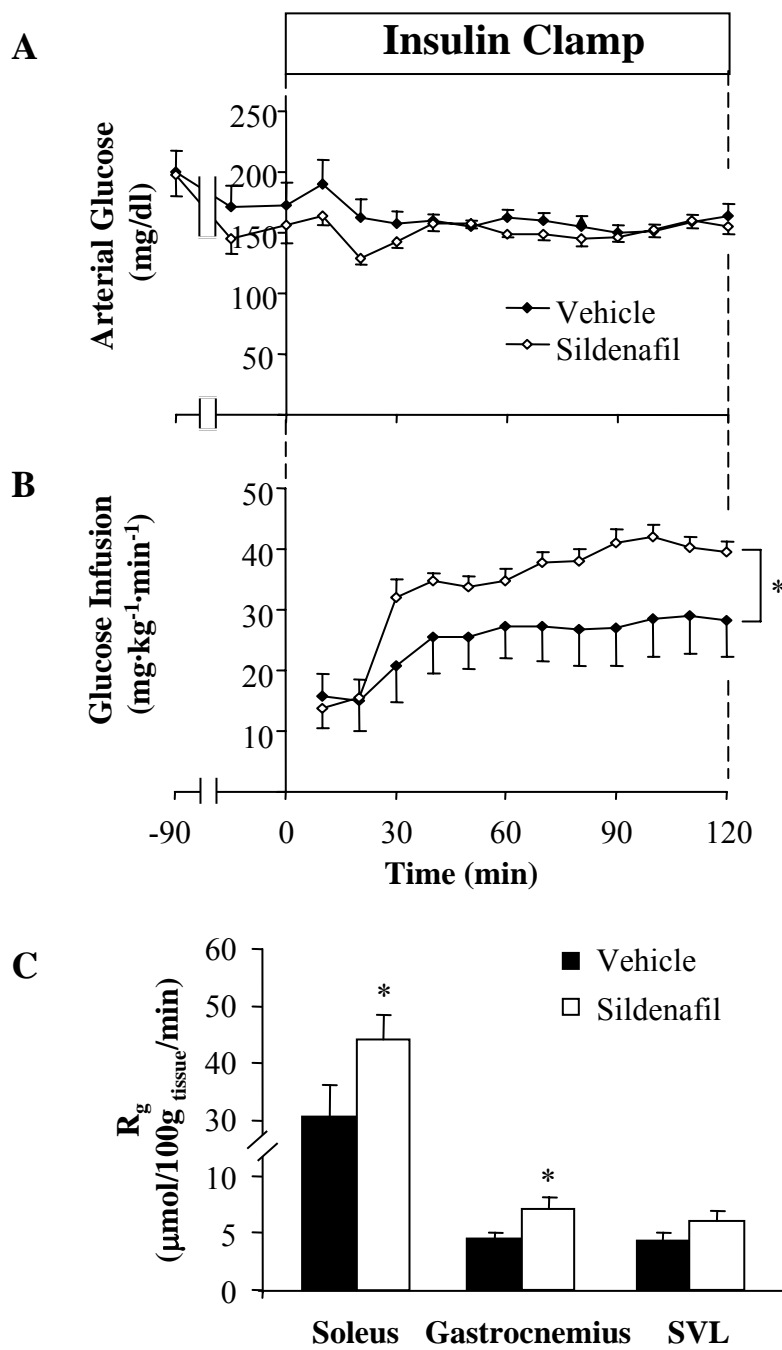

\*  $P \leq 0.05$  vs. Vehicle

**Figure 5**

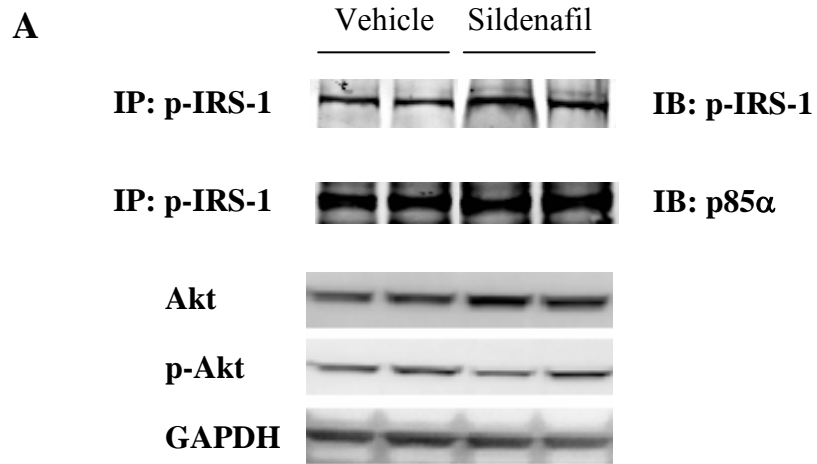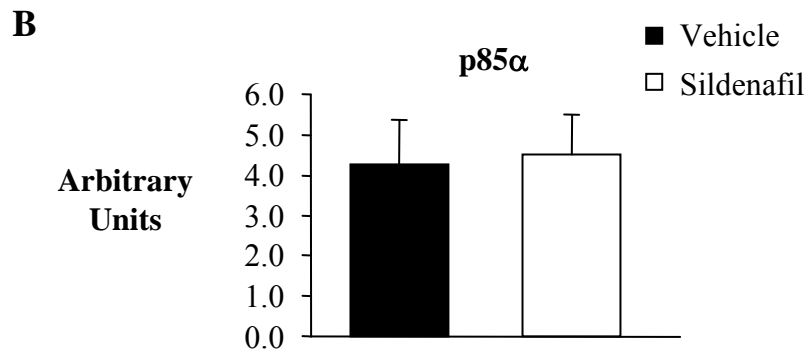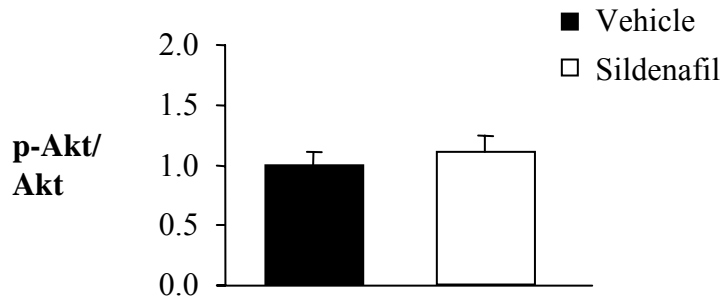

Supplement: Figures_db06-0883.pdf [file Figures_db06-0883.pdf]
